# Supplementary material for: In situ reactive coating of metallic and selenophilic Ag2Se on Se/C cathode materials for high performance Li–Se batteries
Source: Royal Society of Chemistry journal article supplement (doi:10.1039/c8ra06484a), 2018-01-01
Supplement: c8ra06484a1.pdf [file c8ra06484a1.pdf]

## Supporting Information

### ***In-situ* reactive coating of metallic and selenophilic Ag<sub>2</sub>Se on Se/C cathode materials for high performance Li-Se batteries**

*Fugen Sun\**, *Yahui Li<sup>‡</sup>*, *Zilong Wu<sup>‡</sup>*, *Yu Liu*, *Hao Tang*, *Xiaomin Li*, *Zhihao Yue*, *Lang Zhou\**

Institute of Photovoltaics, Nanchang University, 999 Qianhu Road, Nanchang 330031, China.

\* To whom correspondence should be addressed. E-mail: sunfugen@ncu.edu.cn (F. Sun), lzhou@ncu.edu.cn (L. Zhou).

<sup>‡</sup> These authors contributed equally to this work.

#### **Content:**

**Figure S1.** (a) N<sub>2</sub> adsorption-desorption isotherm curve and (b) BJH pore size distribution of NMCs.

**Figure S2.** TEM image of NMCs.

**Figure S3.** (a) XPS survey spectra and (b) high-resolution N1s XPS spectra of NMCs.

**Figure S4.** STEM elemental mapping images of Ag<sub>2</sub>Se@Se/NMC.

**Figure S5.** Photograph of sealed vials of the 0.01 mol/L Li<sub>2</sub>Se<sub>6</sub> in DOL/DME solution, the Li<sub>2</sub>Se<sub>6</sub>/DOL/DME solution after contact with NMCs and Ag<sub>2</sub>Se@NMC after 20 h.

**Figure S6.** EIS of Ag<sub>2</sub>Se@Se/NMC and Se/NMC before the first cycle and after the 50th cycle.

**Table S1.** Powder electrical conductivity of the NMCs, Se/NMC and Ag<sub>2</sub>Se@Se/NMC.

**Table S2.** Comparison of our results with the previously reported works on the Se-based composites.

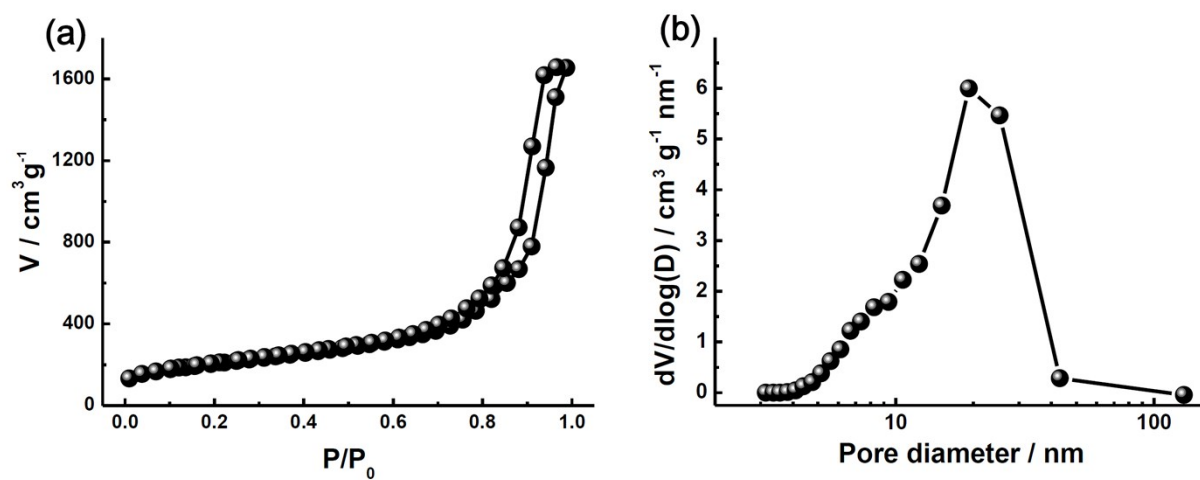

**Figure S1.** (a) N<sub>2</sub> adsorption-desorption isotherm curve and (b) BJH pore size distribution of NMCs. The isotherm of the NMCs exhibit type IV behaviour following the IUPAC classification, indicating that the NMCs are typically mesoporous carbon materials. The BET surface area and total pore volume are 731 m<sup>2</sup> g<sup>-1</sup> and 2.6 cm<sup>3</sup> g<sup>-1</sup>, respectively.

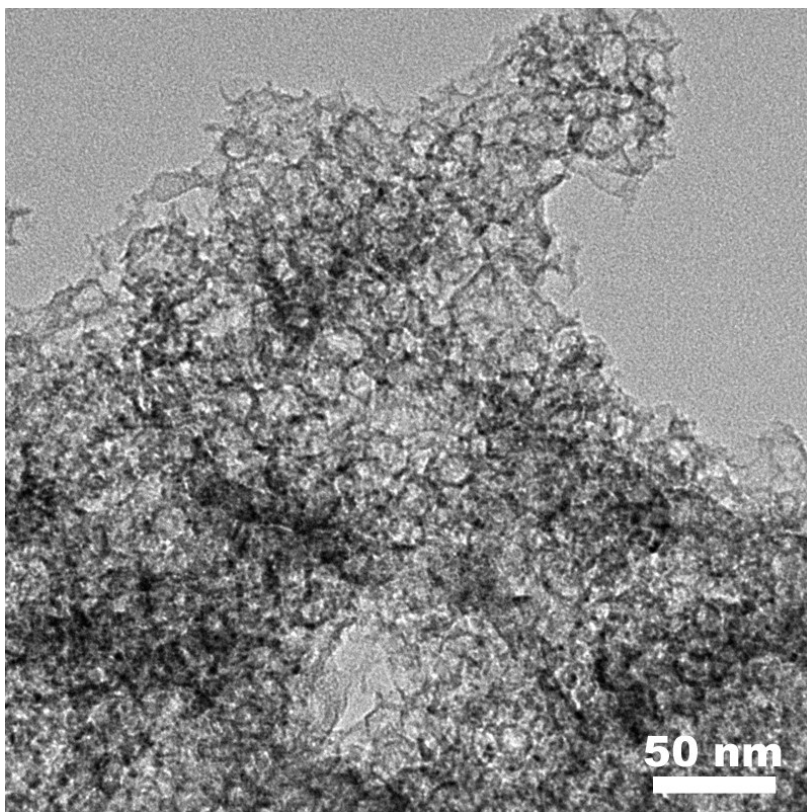

**Figure S2.** TEM image of NMCs. The NMCs sample consists of developed and spherical mesopores.

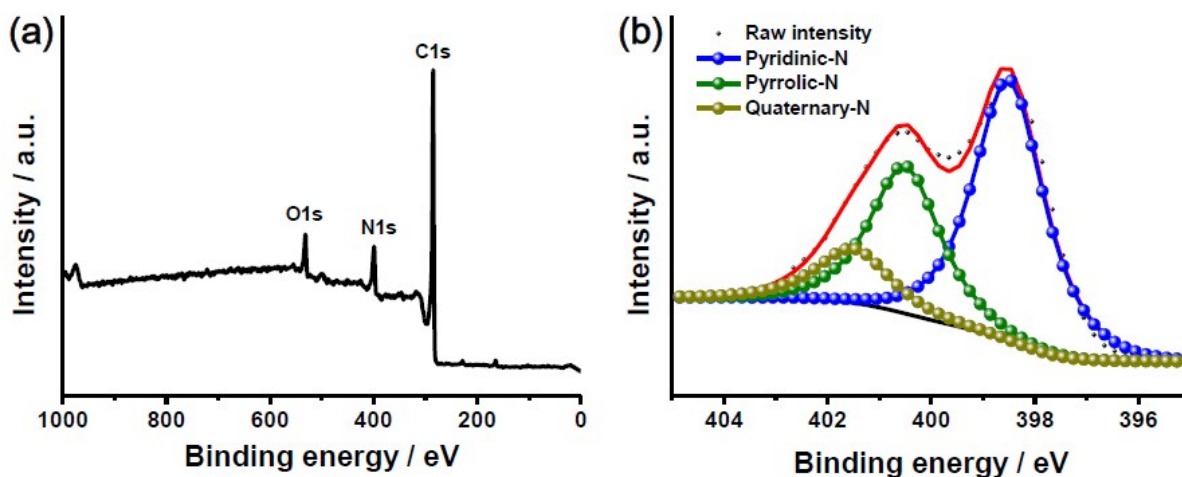

**Figure S3.** (a) XPS survey spectra and (b) high-resolution  $N1s$  XPS spectra of NMCs. The XPS survey spectra of the NMCs possess three peaks centered at 284.6, 400.0, and 513.4 eV, corresponding to  $C1s$ ,  $N1s$ , and  $O1s$ , respectively, thus excluding the presence of any other impurities. The  $N1s$  XPS spectra were curve-fitted into three peaks with binding energies of 398.5, 400.5 and 401.6 eV corresponding to pyridinic N, pyrrolic N, and graphitic N, respectively.

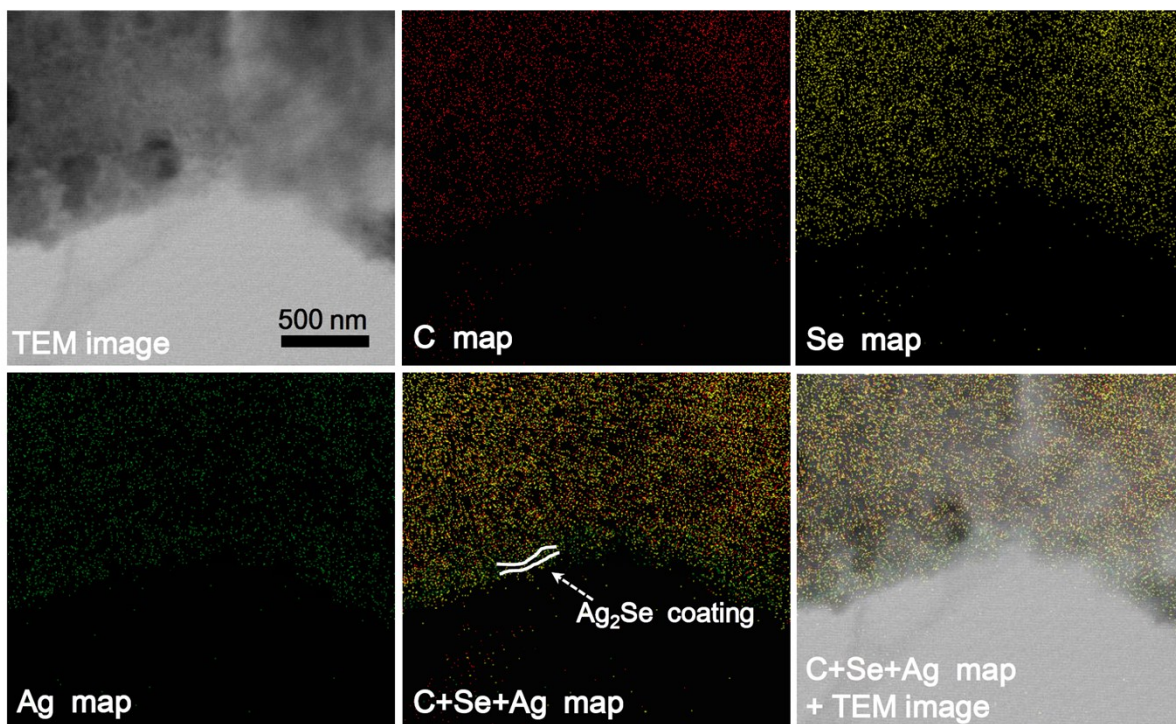

**Figure S4.** STEM elemental mapping images of  $\text{Ag}_2\text{Se}@\text{Se}/\text{NMC}$ . From the multi-elemental overlay images of C, Se, Ag, it can be clearly seen that the area of C is a little smaller than those of Se and Ag. The gap between the areas of C and Ag clearly indicates the position of  $\text{Ag}_2\text{Se}$  coating on the surfaces of Se/NMC composites.

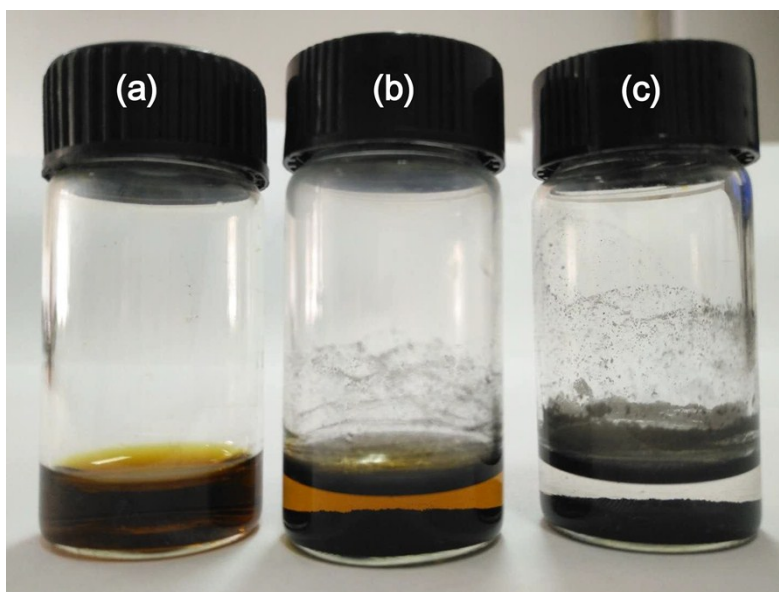

**Figure S5.** Photograph of sealed vials of the 0.01 mol/L  $\text{Li}_2\text{Se}_6$  in DOL/DME (1:1, v/v) solution (a), the  $\text{Li}_2\text{Se}_6$ /DOL/DME solution after contact with NMCs (b) and  $\text{Ag}_2\text{Se}@$ NMC (c) after 20 h. The  $\text{Ag}_2\text{Se}@$ NMC samples were obtained by thermal evaporation of Se from  $\text{Ag}_2\text{Se}@$ Se/NMC. It can be clearly observed that the color of the  $\text{Li}_2\text{Se}_6$  solution changes from dark brown to light brown and transparent color, respectively after adsorption by NMCs and  $\text{Ag}_2\text{Se}@$ NMC for 20 h. The significant decoloration of  $\text{Li}_2\text{Se}_6$  solution after the adsorption of  $\text{Ag}_2\text{Se}@$ NMC confirms the enhanced adsorption capability toward polyselenides of NMCs after  $\text{Ag}_2\text{Se}$  coating.

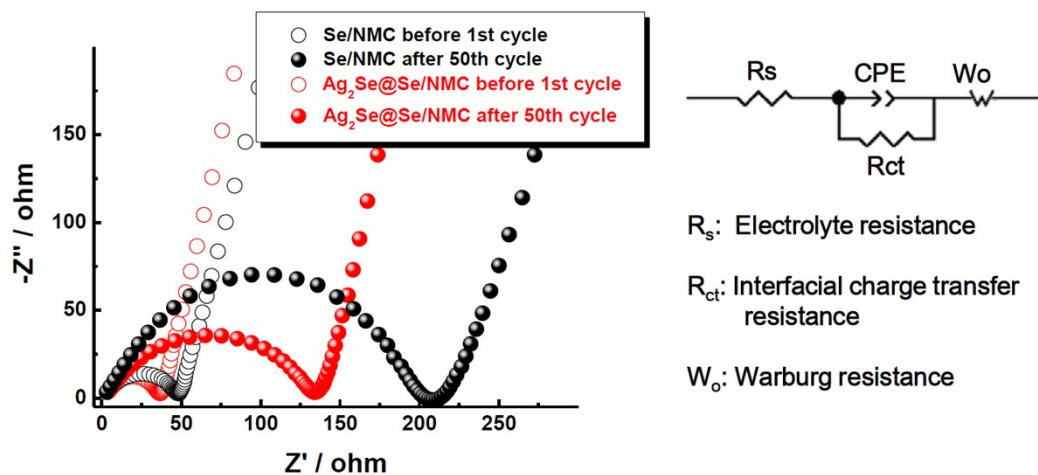

**Figure S6.** EIS of Ag<sub>2</sub>Se@Se/NMC and Se/NMC before the first cycle and after the 50th cycle.  $R_{ct}$  is quantified by the x-axis intersect of the semicircle in the high-frequency domain, while  $W_o$  is represented by the straight line in the low-frequency region. Upon cycling, the increase of the interfacial charge transfer resistance  $R_{ct}$  could be attributed to the decomposition of electrolyte on the electrode surface and the volume variation. More importantly,  $R_{ct}$  of Ag<sub>2</sub>Se@Se/NMC is lower than that of Se/NMC both before 1st and after 50th cycle, indicating that the interfacial charge transfer of Ag<sub>2</sub>Se@Se/NMC is much faster than that of Se/NMC.

**Table S1.** Powder electrical conductivity of the NMCs, Se/NMC and Ag<sub>2</sub>Se@Se/NMC.

| Samples                                             | NMCs | Se/NMC | Ag <sub>2</sub> Se@Se/NMC |
|-----------------------------------------------------|------|--------|---------------------------|
| Powder electrical conductivity / S cm <sup>-1</sup> | 0.26 | 0.21   | 0.34                      |

**Table S2.** Comparison of our results with the previously reported works on the Se-based composites.

| Composite                | Electrolyte | Se loading / wt. % | Current rate | Initial cycle Discharge capacity / mAh g <sup>-1</sup> (Coulombi efficiency / %) | Reversible capacity mAh g <sup>-1</sup>                                      |
|--------------------------|-------------|--------------------|--------------|----------------------------------------------------------------------------------|------------------------------------------------------------------------------|
| Se/BPC <sup>1</sup>      | DOL/DME     | 45.1               | 0.5 C        | 560 (79.0)                                                                       | 246 (80 cycles)                                                              |
|                          |             |                    | 1 C          | 552 (84.4)                                                                       | 264 (80 cycles)                                                              |
| Se/MCN-RGO <sup>2</sup>  |             | 62                 | 0.1 C        | 655 (96.5)                                                                       | 568 (100 cycles)                                                             |
| Se/PPy HS <sup>3</sup>   |             | 52.4               | 0.2 C        | 630 (94.7)                                                                       | 400 (80 cycles)                                                              |
| Se/CMCs <sup>4</sup>     |             | 49.7               | 0.2 C        | 780 (80.2)                                                                       | 425 (100 cycles)<br>308 (460 cycles)                                         |
|                          |             |                    | 0.5 C        | 688 (/)                                                                          | 253 (100 cycles)<br>239 (200 cycles)<br>232 (400 cycles)<br>231 (460 cycles) |
| Se-NCHPC <sup>5</sup>    |             | 56.2               | 0.5 C        | 636 (81.3)                                                                       | 330 (30 cycles)                                                              |
|                          |             |                    | 1 C          | 535 (90.9)                                                                       | 277 (50 cycles)                                                              |
| Se/PHCS <sup>6</sup>     |             | 60                 | 0.1 C        | 590 (92.6)                                                                       | 338 (50 cycles)                                                              |
| HCPS/Se <sup>7</sup>     |             | 41.2               | 0.5 C        | 572 (83.9)                                                                       | 299 (100 cycles)                                                             |
| Se-CP <sup>8</sup>       |             | 60                 | 1 C          | 1504 (99)                                                                        | 413 (50 cycles)                                                              |
| meso-C@Se <sup>9</sup>   |             | 48                 | 0.5 C        | 641 (58.0)                                                                       | 301 (100 cycles)                                                             |
|                          |             |                    | 1 C          | 661 (/)                                                                          | 320 (100 cycles)                                                             |
| Se@C <sup>10</sup>       |             | 68                 | 0.1 C        | 660 (99)                                                                         | 300 (100 cycles)                                                             |
| Se@RGO <sup>11</sup>     |             | 80                 | 0.2 C        | 533 (98)                                                                         | 352 (100 cycles)<br>308 (200 cycles)                                         |
| HPCA/Se <sup>12</sup>    |             | 56                 | 0.5 C        | 587 (46.5)                                                                       | 367 (50 cycles)                                                              |
| Se/C <sup>13</sup>       |             | 43.2               | 0.5 C        | 558 (69.3)                                                                       | 181 (80 cycles)                                                              |
| MWCNT/Se-S <sup>14</sup> |             | 56.2               | 0.5 C        | 646 (79.2)                                                                       | 356 (80 cycles)                                                              |
| 3DG-CNT@Se <sup>15</sup> | 51          | 0.2 C              | 633 (93.4)   | 531 (100 cycles)<br>504 (150 cycles)                                             |                                                                              |



|                                             |        |      |            |                                                          |                                                          |
|---------------------------------------------|--------|------|------------|----------------------------------------------------------|----------------------------------------------------------|
| TiO <sub>2</sub> -Se <sup>16</sup>          |        | 70.8 | 0.1 C      | 481 (53.0)                                               | 158 (50 cycles)                                          |
| MCM-3.8-Se <sup>17</sup>                    |        | 49.5 | 0.5 C      | 513 (92.4)                                               | 300 (100 cycles)                                         |
| C-Co-N/Se <sup>18</sup>                     |        | 76.5 | 0.1 C      | 672 (97.1)                                               | 588 (100 cycles)<br>574 (200 cycles)                     |
| Ag <sub>2</sub> Se@<br>Se/NMC<br>(Our work) |        | 67   | 0.2 C      | 652 (97.7)                                               | 382 (100 cycles)                                         |
|                                             | 0.5 C  |      | 594 (96.9) | 358 (100 cycles)<br>298 (200 cycles)<br>206 (400 cycles) |                                                          |
|                                             | 1 C    |      | 541 (97.1) | 301 (100 cycles)<br>243 (200 cycles)<br>193 (400 cycles) |                                                          |
| Se/CMK-3 <sup>19</sup>                      | EC/DEC | 49   | 0.1 C      | 920 (57.8)                                               | 600 (50 cycles)                                          |
| Se/Meso-CS <sup>20</sup>                    |        | 30   | 0.25 C     | 480 (34.9)                                               | 476 (100 cycles)<br>462 (200 cycles)<br>489 (500 cycles) |
| Se@N-MPC <sup>21</sup>                      |        | 50   | 0.5 C      | 480 (34.9)                                               | 476 (100 cycles)<br>462 (200 cycles)<br>489 (500 cycles) |
| Se-MC <sup>22</sup>                         |        | 51   | 0.1 C      | 920 (57.8)                                               | 600 (50 cycles)                                          |
| Se/CNF <sup>23</sup>                        |        | 52.3 | 0.07 C     | 1022 (61.3)                                              | 568 (100 cycles)<br>570 (200 cycles)                     |
| Se/PTCDA-C <sup>24</sup>                    |        | 54   | 0.15 C     | 897 (56.9)                                               | 317 (100 cycles)                                         |
| Se/MPCS <sup>25</sup>                       |        | 60   | 0.1 C      | 663 (57)                                                 | 643 (100 cycles)                                         |
| Se/PCS <sup>26</sup>                        |        | 60   | 0.5 C      | 560 (64.5)                                               | 456 (100 cycles)<br>433 (200 cycles)                     |
| Se/Micro-C <sup>27</sup>                    |        | 60   | 1 C        | 926 (72.9)                                               | 540 (100 cycles)                                         |
| Se/Micro-CS <sup>28</sup>                   |        | 70.5 | 1 C        | 857.8 (56.5)                                             | 463 (100 cycles)<br>348 (200 cycles)                     |

The comparison between our results and the previously reported works demonstrate that the electrochemical performance of the Ag<sub>2</sub>Se@Se/NMC is among the best series of Se-based cathode materials when the key performance indicators including the reversible capacity, the initial coulombic efficiency, the Se loading and the used electrolyte are all considered.

## References

- [1] Y. Qu, Z. Zhang, Y. Lai, Y. Liu, J. Li, A Bimodal Porous Carbon with High Surface Area Supported Selenium Cathode for Advanced Li-Se Batteries, *Solid State Ionics* 274 (2015) 71-76
- [2] K. Han, Z. Liu, J. Shen, Y. Lin, F. Dai, H. Ye, A Free-standing and Ultralong-life Lithium-selenium Battery Cathode Enabled by 3D Mesoporous Carbon/Graphene Hierarchical Architecture, *Adv. Funct. Mater.* 25 (2015) 455-463
- [3] J. Guo, Z. Wen, G. Ma, J. Jin, W. Wang, Y. Liu, A Selenium@Polypyrrole Hollow

- Sphere Cathode for Rechargeable Lithium Batteries, *RSC Adv.* 5 (2015) 20346-20350
- [4] T. Liu, M. Jia, Y. Zhang, J. Han, Y. Li, S. Bao, D. Liu, J. Jiang, M. Xu, Confined Selenium within Metal-organic Frameworks Derived Porous Carbon Microcubes as Cathode for Rechargeable Lithium-selenium Batteries, *J. Power Sources* 341 (2017) 53-59
- [5] Y. Qu, Z. Zhang, S. Jiang, X. Wang, Y. Lai, Y. Liu, J. Li, Confining Selenium in Nitrogen-containing Hierarchical Porous Carbon for High-rate Rechargeable Lithium-selenium Batteries, *J. Mater. Chem. A* 2 (2014) 12255-12261
- [6] Y. Lai, F. Yang, Z. Zhang, S. Jiang, J. Li, Encapsulation of Selenium in Porous Hollow Carbon Spheres for Advanced Lithium-selenium Batteries, *RSC Adv.* 4 (2014) 39312-39315
- [7] J. Li, X. Zhao, Z. Zhang, Y. Lai, Facile Synthesis of Hollow Carbonized Polyaniline Spheres to Encapsulate Selenium for Advanced Rechargeable Lithium-Selenium Batteries, *J Alloys Compounds* 619 (2015) 794-799
- [8] Z. Yi, L. Yuan, D. Sun, Z. Li, C. Wu, W. Yang, Y. Wen, B. Shan Y. Huang, High-performance Lithium-selenium Batteries Promoted by Heteroatom-doped Microporous Carbon, *J. Mater. Chem. A* 3 (2015) 3059-3065
- [9] Y. Lai, Y. Gan, Z. Zhang, W. Chen, J. Li, Metal-organic Frameworks-derived Mesoporous Carbon for High Performance Lithium-selenium Battery, *Electrochim. Acta* 146 (2014) 134-141
- [10] J. Guo, Q. Wang, C. Qi, J. Jin, Y. Zhu, Z. Wen, One-step Microwave Synthesized Core-shell Structured Selenium@Carbon Spheres as Cathode Materials for Rechargeable Lithium Batteries, *Chem. Commun.* 52 (2016) 5613-5616
- [11] X. Peng, L. Wang, X. Zhang, B. Gao, J. Fu, S. Xiao, K. Huo, P. K. Chu, Reduced Graphene Oxide Encapsulated Selenium Nanoparticles for High-power Lithium-selenium Battery Cathode, *J. Power Sources* 288 (2015) 214-220
- [12] S. Jiang, Z. Zhang, Y. Lai, Y. Qu, X. Wang, J. Li, Selenium Encapsulated into 3D Interconnected Hierarchical Porous Carbon Aerogels for Lithium-selenium Batteries with High Rate Performance and Cycling Stability, *J. Power Sources* 267 (2014) 394-404
- [13] Z. Zhang, X. Yang, Z. Guo, Y. Qu, J. Li, Y. Lai, Selenium/Carbon-rich Core-shell Composites as Cathode Materials for Rechargeable Lithium-selenium Batteries, *J. Power Sources* 279 (2015) 88-93
- [14] X. Wang, Z. Zhang, Y. Qu, G. Wang, Y. Lai, J. Li, Solution-based Synthesis of Multi-walled Carbon Nanotube/selenium Composites for High Performance Lithium-selenium Battery, *J. Power Sources* 287 (2015) 247-252
- [15] J. He, Y. Chen, W. Lv, K. Wen, P. Li, Z. Wang, W. Zhang, W. Qin, W. He, Three-dimensional Hierarchical Graphene-CNT@Se: A Highly Efficient Freestanding Cathode for Li-Se Batteries, *ACS Energy Lett.* 1 (2016) 16-20
- [16] Z. Zhang, X. Yang, X. Wang, Q. Li, Z. Zhang, TiO<sub>2</sub>-Se Composites as Cathode Material for Rechargeable Lithium-selenium Batteries, *Solid State Ionics* 260 (2014) 101-106
- [17] L. Liu, Y. Wei, C. Zhang, C. Zhang, X. Li, J. Wang, L. Ling, W. Qiao, D. Long, Enhanced Electrochemical Performances of Mesoporous Carbon Microsphere/selenium Composites by Controlling the Pore-structure and Nitrogen-doping, *Electrochim. Acta* 153 (2015) 140-148
- [18] J. He, W. Lv, Y. Chen, J. Xiong, K. Wen, C. Xu, W. Zhang, Y. Li, W. Qin, W. He, Three-dimensional Hierarchical C-Co-N/Se Derived from Metal-organic Framework as Superior Cathode for Li-Se Batteries, *J. Power Sources* 363 (2017) 103-109
- [19] C. Yang, S. Xin, Y. Yin, H. Ye, J. Zhang, Y. Guo, An Advanced Selenium-carbon Cathode for Rechargeable Lithium-selenium Batteries, *Angew. Chem. Int. Ed.* 52 (2013)

8363-8368

- [20] C. Luo, Y. Xu, Y. Zhu, Y. Liu, S. Zheng, Y. Liu, A. Langrock, C. Wang, Selenium@Mesoporous Carbon Composite with Superior Lithium and Sodium Storage Capacity, *ACS Nano* 7 (2013) 8003-8010
- [21] Y. Jiang, X. Ma, J. Feng, S. Xiong, Selenium in Nitrogen-doped Microporous Carbon Spheres for High-performance Lithium-Selenium Batteries, *J. Mater. Chem. A* 3 (2015) 4539-4546
- [22] Y. Liu, L. Si, X. Zhou, X. Liu, Y. Xu, J. Bao, Z. Dai, A Selenium-confined Microporous Carbon Cathode for Ultrastable Lithium-Selenium Batteries, *J. Mater. Chem. A* 2 (2014) 17735-17739
- [23] L. Zeng, W. Zeng, Y. Jiang, X. Wei, W. Li, C. Yang, Y. Zhu, Y. Yu, A Flexible Porous Carbon Nanofibers-selenium Cathode with Superior Electrochemical Performance for Both Li-Se and Na-Se Batteries, *Adv. Energy Mater.* 5 (2015) 1401377-1401386
- [24] C. Luo, J. Wang, L. Suo, J. Mao, X. Fan, C. Wang, In Situ Formed Carbon Bonded and Encapsulated Selenium Composites for Li-Se and Na-Se Batteries, *J. Mater. Chem. A* 3 (2015) 555-561
- [25] H. Ye, Y. Yin, S. Zhang, Y. Guo, Advanced Se-C Nanocomposites: A Bifunctional Electrode Material for Both Li-Se and Li-ion Batteries, *J. Mater. Chem. A* 2 (2014) 13293-13298
- [26] Z. Li, L. Yin, MOF-derived, N-doped, Hierarchically Porous Carbon Sponges as Immobilizers to Confine Selenium as Cathodes for Li-Se Batteries with Superior Storage Capacity and Perfect Cycling Stability, *Nanoscale* 7 (2015) 9597-9606
- [27] Z. Yi, L. Yuan, D. Sun, Z. Li, C. Wu, W. Yang, Y. Wen, B. Shan, Y. Huang, High-performance Lithium-selenium Batteries Promoted by Heteroatom-doped Microporous Carbon, *J. Mater. Chem. A* 3 (2015) 3059-3065
- [28] Z. Li, L. Yuan, Z. Yi, Y. Liu, Y. Huang, Confined Selenium within Porous Carbon Nanospheres as Cathode for Advanced Li-Se Batteries, *Nano Energy* 9 (2014) 229-236
